# Supplementary material
Source: Research Square preprint supplement (doi:10.21203/rs.3.rs-8701520/v1)
Supplement: Supplementary file 1 [file d73f46405ba68a1021c35b6f.pdf]

# Supplementary Material

A hard look at TVA's promises: Comparing the same quantitative estimates of attention across two tasks

Kai Biemeier<sup>\*,1</sup> & Ingrid Scharlau<sup>1</sup>

<sup>1</sup> Paderborn University, Psychology, Paderborn, 33102, Germany

\* kai.biemeier@uni-paderborn.de

## Single Participant TOJ Simulation Study - S1

Using the TOJ Simulator in the `tvsam` package, we studied the absolute mean difference between the estimate  $C$  of a single participant and the ground truth  $C$ . For this purpose we simulated 200 participants and calculated for them the sample mean:

$$E[|C_{Model} - C_{GroundTruth}|] \approx \sum_{i=0}^{200} |\hat{C}_i - C_i| \approx 7.63 \quad (1)$$

The complete source code for the simulation is given in the OSF repository in the `tojsim.ipynb`. Its analysis is provided in the same repository in the `toj_sim_analysis.ipynb`. We also provided the trace of our simulation in `benchmark_toj.csv`.

## Single Participant WR Simulation Study - S2

Using the WR Simulator in the `tvsam` package, we studied the absolute mean difference between the estimate  $C$  of a single participant and the ground truth  $C$ . For this purpose we simulated 200 participants and calculated for them the sample mean:

$$E[|C_{Model} - C_{GroundTruth}|] \approx \sum_{i=0}^{200} |\hat{C}_i - C_i| \approx 6.22 \quad (2)$$

The complete source code for the simulation is given in the OSF repository in the `wrsim.ipynb`. Its analysis is provided in the same repository in the `wr_sim_analysis.ipynb`. We also provided the trace of our simulation in `benchmark_wr.csv`.
